# Supplementary material
Source: Springer Nature journal article supplement (https://www.springermedizin.de/resource/supplementary/12879_2012_2216_MOESM2_ESM.pdf/9443814)
Supplement: MOESM2 [file 9443814]

**Table 2. Univariable and multivariable risk factors for secondary *Shigella* transmission to 337 contacts within 102 households\*, Amsterdam, The Netherlands 2002-2009.**

| Exposure                                                | Total no. Of household contacts |    | Any secondary transmission |      | Univariable |       |         |      | Multivariable |       |         |  |
|---------------------------------------------------------|---------------------------------|----|----------------------------|------|-------------|-------|---------|------|---------------|-------|---------|--|
|                                                         | N                               | n  | %                          | RR   | 95% CI      |       | p value | RR   | 95% CI        |       | p value |  |
|                                                         |                                 |    |                            |      | lower       | upper |         |      | lower         | upper |         |  |
| <b>Contact characteristics (n=337 contacts)</b>         |                                 |    |                            |      |             |       |         |      |               |       |         |  |
| Total                                                   | 337                             | 25 | 7.4                        | n/a  | n/a         | n/a   | n/a     | n/a  | n/a           | n/a   | n/a     |  |
| Age-group                                               |                                 |    |                            |      |             |       |         |      |               |       |         |  |
| ≥ 6 years                                               | 260                             | 17 | 6.5                        | ref. | ref.        | ref.  | ref.    | ref. | ref.          | ref.  | ref.    |  |
| 0-3                                                     | 48                              | 3  | 6.3                        | 1.0  | 0.3         | 3.3   | 0.943   | 1.0  | 0.3           | 3.2   | 0.979   |  |
| 4-5                                                     | 29                              | 5  | 17.2                       | 2.6  | 1.0         | 6.8   | 0.046   | 1.3  | 0.6           | 3.0   | 0.527   |  |
| Gender                                                  |                                 |    |                            |      |             |       |         |      |               |       |         |  |
| Female                                                  | 171                             | 17 | 9.9                        | ref. | ref.        | ref.  | ref.    |      |               |       |         |  |
| Male                                                    | 166                             | 8  | 4.8                        | 0.5  | 0.2         | 1.2   | 0.109   |      |               |       |         |  |
| Country of birth                                        |                                 |    |                            |      |             |       |         |      |               |       |         |  |
| Netherlands / Other Western                             | 97                              | 7  | 7.2                        | ref. | ref.        | ref.  | ref.    |      |               |       |         |  |
| Other                                                   | 236                             | 18 | 7.6                        | 1.1  | 0.5         | 2.3   | 0.890   |      |               |       |         |  |
| Diarrhoea                                               |                                 |    |                            |      |             |       |         |      |               |       |         |  |
| No                                                      | 228                             | 5  | 2.2                        | ref. | ref.        | ref.  | ref.    | ref. | ref.          | ref.  | ref.    |  |
| Yes                                                     | 87                              | 20 | 23.0                       | 10.5 | 3.7         | 29.9  | <0.001  | 8.0  | 2.7           | 23.8  | <0.001  |  |
| Hospitalised                                            |                                 |    |                            |      |             |       |         |      |               |       |         |  |
| No                                                      | 336                             | 24 | 7.1                        | ref. | ref.        | ref.  | ref.    |      |               |       |         |  |
| Yes                                                     | 1                               | 1  | 100.0                      | -    | -           | -     | -       |      |               |       |         |  |
| <b>Household factors (n=102 households)</b>             |                                 |    |                            |      |             |       |         |      |               |       |         |  |
| Household size                                          |                                 |    |                            |      |             |       |         |      |               |       |         |  |
| 2-4 persons (in 61 households)                          | 128                             | 5  | 3.9                        | ref. | ref.        | ref.  | ref.    | ref. | ref.          | ref.  | ref.    |  |
| 5-6 persons (in 24 households)                          | 96                              | 5  | 5.2                        | 1.3  | 0.4         | 4.8   | 0.658   | 1.4  | 0.4           | 4.6   | 0.570   |  |
| >6 persons (in 17 households)                           | 113                             | 15 | 13.3                       | 3.4  | 1.3         | 8.7   | 0.011   | 3.1  | 0.9           | 10.1  | 0.064   |  |
| Age of primary case in household                        |                                 |    |                            |      |             |       |         |      |               |       |         |  |
| ≥ 6 years                                               | 218                             | 11 | 5.1                        | ref. | ref.        | ref.  | ref.    | ref. | ref.          | ref.  | ref.    |  |
| 0-3                                                     | 58                              | 6  | 10.3                       | 2.1  | 0.8         | 5.5   | 0.152   | 2.6  | 1.0           | 7.1   | 0.061   |  |
| 4-5                                                     | 61                              | 8  | 13.1                       | 2.6  | 1.2         | 5.7   | 0.018   | 1.9  | 0.8           | 4.5   | 0.163   |  |
| Gender of primary case in household                     |                                 |    |                            |      |             |       |         |      |               |       |         |  |
| Female                                                  | 174                             | 9  | 5.2                        | ref. | ref.        | ref.  | ref.    |      |               |       |         |  |
| Male                                                    | 163                             | 16 | 9.8                        | 1.9  | 0.9         | 4.1   | 0.103   |      |               |       |         |  |
| Primary case in household hospitalised                  |                                 |    |                            |      |             |       |         |      |               |       |         |  |
| No                                                      | 264                             | 21 | 8.0                        | ref. | ref.        | ref.  | ref.    |      |               |       |         |  |
| Yes                                                     | 73                              | 4  | 5.5                        | 1.0  | 0.9         | 1.2   | 0.405   |      |               |       |         |  |
| Time from date of onset to notification of primary case |                                 |    |                            |      |             |       |         |      |               |       |         |  |
| ≤1 week                                                 | 95                              | 9  | 9.5                        | ref. | ref.        | ref.  | ref.    |      |               |       |         |  |
| 1-3 weeks                                               | 146                             | 8  | 5.5                        | 0.6  | 0.2         | 1.5   | 0.262   |      |               |       |         |  |
| >3 weeks                                                | 96                              | 8  | 8.3                        | 0.9  | 0.4         | 2.0   | 0.761   |      |               |       |         |  |

\*The unit of analysis is the individual contact (n=337) and cluster characteristics are at the household level: household size, age and gender of the primary case in the household, whether they were hospitalised and time from date of onset to notification of primary case, as above.
